## CORRESPONDENCE

Anesthesiology  
2000; 92:1199  
© 2000 American Society of Anesthesiologists, Inc.  
Lippincott Williams & Wilkins, Inc.

### A Hairy Situation

*To the Editor:*—As a bearded anesthetist, I was interested to read the solution of Drs. Johnson, Bradway, and Blood to the problem of good mask ventilation in the presence of an hirsute face.<sup>1</sup> Although they are correct in their assertion that it is a frequently encountered situation, they are incorrect in their statement that the only previously published solution has been to shave the patient preoperatively. In Great Britain, we are often accused of lagging behind our transatlantic colleagues, especially where high-technology medicine is concerned. However, the technique that Johnson suggests of applying a clear intravenous site dressing is similar to the use of a cut defibrillator pad, which was suggested in a recent correspondence about in the journal *Anaesthesia*.<sup>2</sup> An added advantage of using defibrillator pads is that an urgent shout for them attracts the attention of nearby staff, who might otherwise be preoccupied. Other ideas presented in the correspondence include (1) the use of plastic kitchen wrap around the entire head, which is not to be used with an unstable cervical spine,<sup>3</sup> and (2) placing the caudal end of the mask between the lip and the alveolar ridge, which is also useful in the edentulous.<sup>4</sup>

Facial hair also has been reported to be a cause of difficult intubation because of a handlebar moustache obscuring the view of the larynx. The solution in this case was to force the moustache flat with adhesive

tape. Reflection on these anesthetic problems has made me decide to invest in a new razor.

**Daniel J. Dalgleish, M.D.**  
Specialist Registrar in Anaesthesia  
Anaesthetic Department  
The General Hospital  
St. Helier  
Jersey, British Isles

### References

1. Johnson JO, Bradway JA, Blood T: A hairy situation (letter). *ANESTHESIOLOGY* 1999; 91:595
2. Alexander R, Thomas DI: Overcoming the beard (letter). *Anaesthesia* 1999; 54:100
3. Vincent C, Ames WA: The bearded airway (letter). *Anaesthesia* 1998; 53:1034-5
4. Crooke J: The bearded airway (letter). *Anaesthesia* 1999; 54:500

(Accepted for publication July 8, 1999.)

Anesthesiology  
2000; 92:1199  
© 2000 American Society of Anesthesiologists, Inc.  
Lippincott Williams & Wilkins, Inc.

### Difficult Mask Ventilation

*To the Editor:*—Dr. Johnson *et al.*<sup>1</sup> describe a useful method to reduce gas leaks from the face mask in bearded patients and thus enable adequate oral positive-pressure ventilation *en route* to tracheal intubation.

In this type of situation, one can also opt to avoid the oral route entirely and attempt nasal positive-pressure ventilation instead, using a smaller, clear, padded mask (*i.e.*, the size of a toddler, an infant, or even a neonate mask). Using this technique, the mouth is kept firmly closed and the head is extended. The mask covers the nostrils but does not extend beyond the upper lip. By reducing the surface over which ventilation occurs, the potential for leakage of anesthetic gas may be reduced. Furthermore, the airway often is easier to support if the mouth does not have to be kept open.

Nasal positive-pressure ventilation can be an effective mode of ventilation in edentulous patients when conventional mask ventilation fails because of excessive gas leakage from the mask. It may also be a useful

mode of ventilation in the bearded patient. An occasional problem is leakage of gas from within the mouth, but this leakage is usually not serious enough to compromise ventilation.

**Davinder S. Garewal, M.R.C.P., F.R.C.A.**  
Department of Anaesthesia  
Singapore General Hospital  
Singapore

### Reference

1. Johnson JO, Bradway JA, Blood T: A hairy situation (letter). *ANESTHESIOLOGY* 1999; 91:595

(Accepted for publication July 8, 1999.)
